# Supplementary material for: Procedures in Fecal Microbiota Transplantation for Treating Irritable Bowel Syndrome: Systematic Review and Meta-Analysis
Source: J Clin Med. 2023 Feb 21;12(5):1725. doi: 10.3390/jcm12051725 (PMC10003588; doi:10.3390/jcm12051725)
Supplement: Supplementary file 1 [file jcm-12-01725-s001.zip › jcm-2191679-supplementary.pdf]

## SUPPLEMENTARY MATERIAL

**Supplementary Table S1.** The Rome IV criteria for IBS.

1. Recurrent abdominal pain, on average, at least 1 day per week in the last 3 months and associated with two or more of the following:

- a. Related to defecation.
- b. Associated with a change in frequency of stool;
- c. Associated with a change in form of stool.

**AND**

2. Criteria fulfilled for the last 3 months with symptom onset at least 6 months before diagnosis:

| <u>IBS-C</u>                                                                                             | <u>IBS-D</u>                                                                                             | <u>IBS-M</u>                                                                                                                | <u>IBS-U</u>                                                                                                                        |
|----------------------------------------------------------------------------------------------------------|----------------------------------------------------------------------------------------------------------|-----------------------------------------------------------------------------------------------------------------------------|-------------------------------------------------------------------------------------------------------------------------------------|
| ≥25% of bowel movements of Bristol stool form types 1 or 2, and <25% of Bristol stool form types 6 or 7. | ≥25% of bowel movements of Bristol stool form types 6 or 7, and <25% of Bristol stool form types 1 or 2. | ≥25% of bowel movements of Bristol stool form types 1 or 2, and ≥25% of bowel movements of Bristol stool form types 6 or 7. | Patients who meet criteria for IBS, but who do not fall into one of the other three subgroups according to Bristol stool form type. |

Abbreviations: IBS-C: IBS with constipation; IBS-D: IBS with diarrhea; IBS-M: IBS with mixed bowel habits; IBS-U: IBS unclassified.

Adapted from British Society of Gastroenterology guidelines on the management of irritable bowel syndrome. Gut 2021;70:1214-1240.10

**Supplementary Table S2.** Bristol stool form scale

|        |                                                  |
|--------|--------------------------------------------------|
| Type 1 | Separate hard lumps, like nuts (hard to pass).   |
| Type 2 | Sausage-shaped but lumpy.                        |
| Type 3 | Like a sausage but with cracks on its surface.   |
| Type 4 | Like a sausage or snake, smooth and soft.        |
| Type 5 | Soft blobs with clear-cut edges (passed easily). |
| Type 6 | Fluffy pieces with ragged edges, a mushy stool.  |
| Type 7 | Watery, no solid pieces.                         |

Adapted from Validity and reliability of the Bristol Stool Form Scale in healthy adults and patients with diarrhea-predominant irritable bowel syndrome. Aliment Pharmacol Ther. 2016;44(7):693-703.

**Supplementary Table S3.** Query definition referring to fecal microbiota transplantation combined with terms referring to irritable bowel syndrome (#1 AND #2 AND #3).

| # | PUBMED                                                                                                                                                                                                                                                                                                                                                                                                                       | SCOPUS                                                                                                                                                                                                                                                                                                                | WEB OF SCIENCE                                                                                                                                                                                                                                                                                                                                                                                                                                                            | COCHRANE                                                                                                                                                                                                                                                                                                                                                                                                                                            |
|---|------------------------------------------------------------------------------------------------------------------------------------------------------------------------------------------------------------------------------------------------------------------------------------------------------------------------------------------------------------------------------------------------------------------------------|-----------------------------------------------------------------------------------------------------------------------------------------------------------------------------------------------------------------------------------------------------------------------------------------------------------------------|---------------------------------------------------------------------------------------------------------------------------------------------------------------------------------------------------------------------------------------------------------------------------------------------------------------------------------------------------------------------------------------------------------------------------------------------------------------------------|-----------------------------------------------------------------------------------------------------------------------------------------------------------------------------------------------------------------------------------------------------------------------------------------------------------------------------------------------------------------------------------------------------------------------------------------------------|
| 1 | "fecal"[Title/Abstract] OR<br>"faecal"[Title/Abstract] OR<br>"feces"[MeSH Terms] OR<br>"feces"[Title/Abstract] OR<br>"faeces"[Title/Abstract] OR<br>"stool"[Title/Abstract] OR<br>"gut"[Title/Abstract] OR<br>"microbiota"[MeSH Terms]<br>OR "microb*"[Title/Abstract]<br>OR<br>"microflora"[Title/Abstract]                                                                                                                 | TITLE-ABS-<br>KEY(fecal) OR TITLE-<br>ABS-KEY(faecal) OR<br>TITLE-ABS-<br>KEY(feces) OR<br>TITLE-ABS-<br>KEY(faeces) OR<br>TITLE-ABS-<br>KEY(stool) OR TITLE-<br>ABS-KEY(gut) OR<br>TITLE-ABS-<br>KEY(microb*) OR<br>TITLE-ABS-<br>KEY(microflora)                                                                    | TI=(fecal OR faecal OR<br>feces OR faeces OR stool<br>OR gut OR microb* OR<br>microflora) OR AB=(fecal<br>OR faecal OR feces OR<br>faeces OR stool OR gut<br>OR microb* OR<br>microflora)                                                                                                                                                                                                                                                                                 | (fecal):ti,ab,kw OR<br>(faecal):ti,ab,kw OR<br>(feces):ti,ab,kw OR MeSH<br>descriptor:[feces] explode<br>all trees OR<br>(stool):ti,ab,kw OR<br>(gut):ti,ab,kw OR<br>(microb*):ti,ab,kw OR<br>MeSH descriptor:<br>[microbiota] explode all<br>trees OR<br>(microflora):ti,ab,kw                                                                                                                                                                     |
| 2 | "transplantation"[MeSH<br>Terms] OR<br>"transplant*"[Title/Abstract]<br>OR<br>"transfusion"[Title/Abstract]<br>OR<br>"implant*"[Title/Abstract]<br>OR "donor*"[Title/Abstract]<br>OR "enema"[Title/Abstract]<br>OR "infusion"[Title/Abstract]<br>OR<br>"reconstitution"[Title/Abstract<br>] OR<br>"transfer"[Title/Abstract] OR]                                                                                             | TITLE-ABS-<br>KEY(transplant*) OR<br>TITLE-ABS-<br>KEY(transfusion) OR<br>TITLE-ABS-<br>KEY(implant) OR<br>TITLE-ABS-<br>KEY(donor*) OR<br>TITLE-ABS-<br>KEY(enema) OR<br>TITLE-ABS-<br>KEY(infusion) OR<br>TITLE-ABS-<br>KEY(reconstitution)<br>OR TITLE-ABS-<br>KEY(transfer)                                       | TI=(transplant* OR<br>transfusion* OR implant<br>OR donor* OR enema OR<br>infusion OR reconstitution<br>OR transfer OR<br>bacteriotherapy) OR<br>AB=(transplant* OR<br>transfusion* OR implant<br>OR donor* OR enema OR<br>infusion OR reconstitution<br>OR transfer)                                                                                                                                                                                                     | MeSH descriptor:<br>[transplantation] in all<br>MeSH products OR<br>(transplant*):ti,ab,kw OR<br>(transfusion):ti,ab,kw OR<br>(implant*):ti,ab,kw OR<br>(donor*):ti,ab,kw OR<br>(enema):ti,ab,kw OR<br>(infusion):ti,ab,kw OR<br>(reconstitution):ti,ab,kw<br>OR (transfer):ti,ab,kw                                                                                                                                                                |
| 3 | "irritable bowel<br>syndrome"[MeSH Terms] OR<br>"irritable bowel<br>syndrome"[Title/Abstract] OR<br>"irritable<br>colon"[Title/Abstract] OR<br>"IBS"[Title/Abstract] OR<br>"dysbiosis"[Title/Abstract]<br>OR "quality of<br>life"[Title/Abstract] OR<br>"functional gastrointestinal<br>disorders"[Title/Abstract] OR<br>"functional gut<br>disorders"[Title/Abstract] OR<br>"functional bowel<br>disorders"[Title/Abstract] | TITLE-ABS-<br>KEY("irritable bowel<br>syndrome") OR TITLE-<br>ABS-KEY(irritable<br>colon) OR TITLE-<br>ABS-KEY("quality of<br>life") OR TITLE-ABS-<br>KEY("functional<br>gastrointestinal<br>disorders") OR TITLE-<br>ABS-KEY("functional<br>gut disorders") OR<br>TITLE-ABS-<br>KEY("functional bowel<br>disorders") | TI=("irritable bowel<br>syndrome" OR "irritable<br>colon" OR dysbiosis OR<br>"quality of life" OR "ibs<br>severity scoring system"<br>OR "functional<br>gastrointestinal disorders"<br>OR "functional gut<br>disorders" OR "functional<br>bowel disorders") OR<br>AB=("irritable bowel<br>syndrome" OR "irritable<br>colon" OR "quality of life"<br>OR "functional<br>gastrointestinal disorders"<br>OR "functional gut<br>disorders" OR "functional<br>bowel disorders") | MeSH descriptor: [irritable<br>bowel syndrome] explode<br>all trees OR (irritable<br>bowel syndrome):ti,ab,kw<br>OR (irritable<br>colon):ti,ab,kw OR<br>(IBS):ti,ab,kw OR MeSH<br>descriptor: [dysbiosis]<br>explode all trees OR<br>(dysbiosis):ti,ab,kw OR<br>(quality of life):ti,ab,kw<br>OR (functional<br>gastrointestinal<br>disorders):ti,ab,kw OR<br>(functional gut<br>disorders):ti,ab,kw OR<br>(functional bowel<br>disorders):ti,ab,kw |

## FIGURES

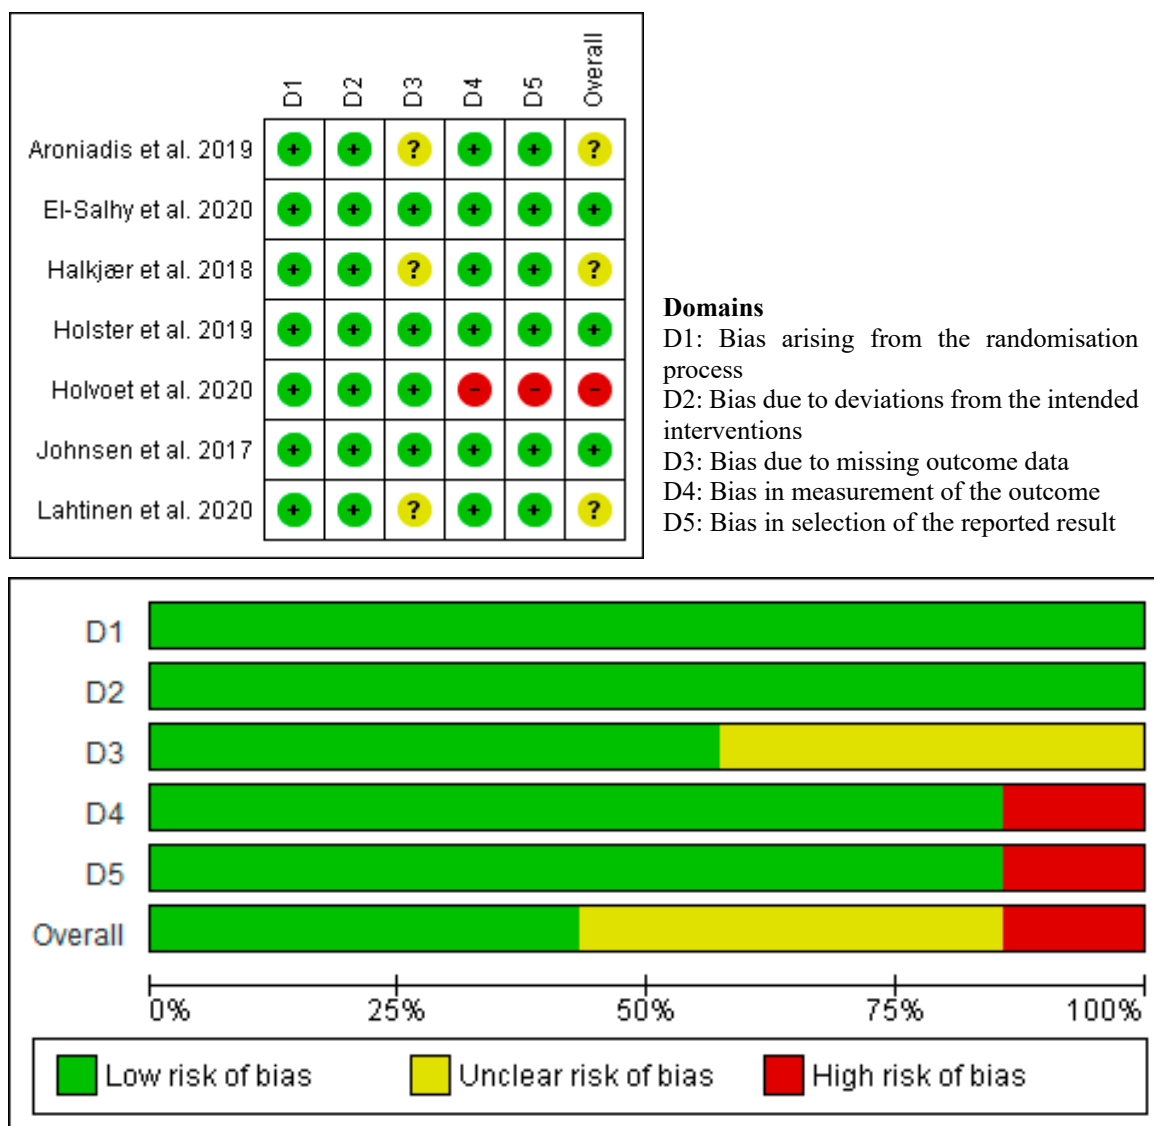

**Supplementary Figure S1.** Risk of bias: judgements about each risk of bias domain presented as percentages across all included studies.

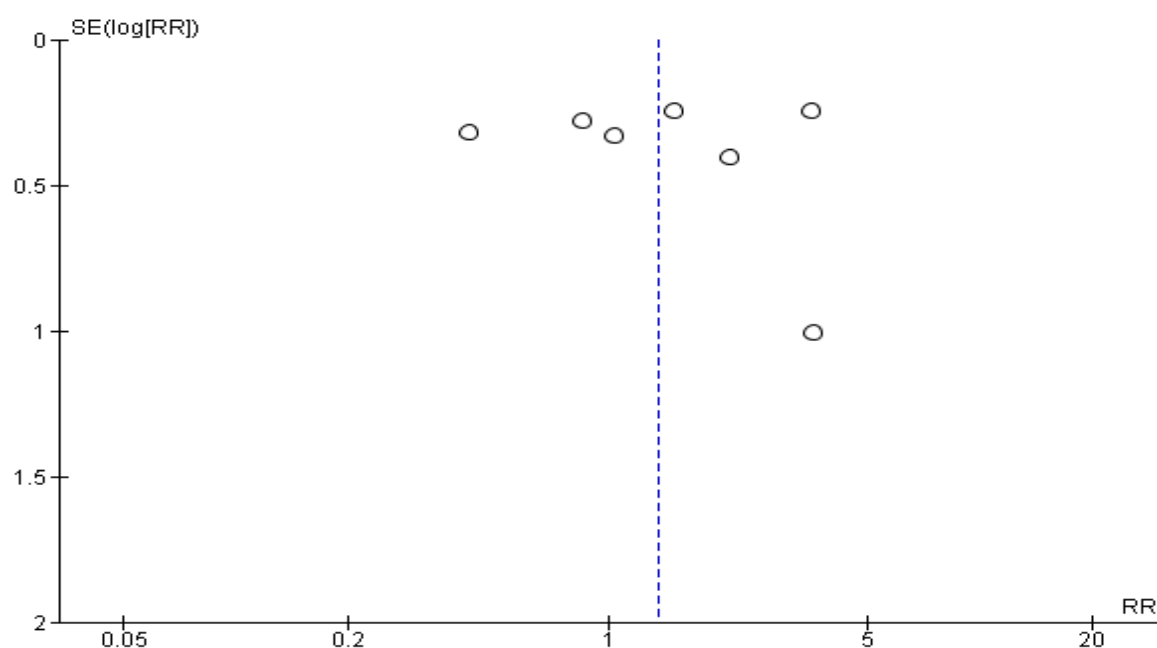

**Supplementary Figure S2.** Publication bias plot analysis. The RR of FMT responders is plotted on the x axis and the SE of the RR is plotted on the y axis. The vertical dotted line denotes the mean value of the RRs reported by the 7 included studies. Abbreviations: FMT: fecal microbiota transplantation; RR: risk ratio; SE: standard error.

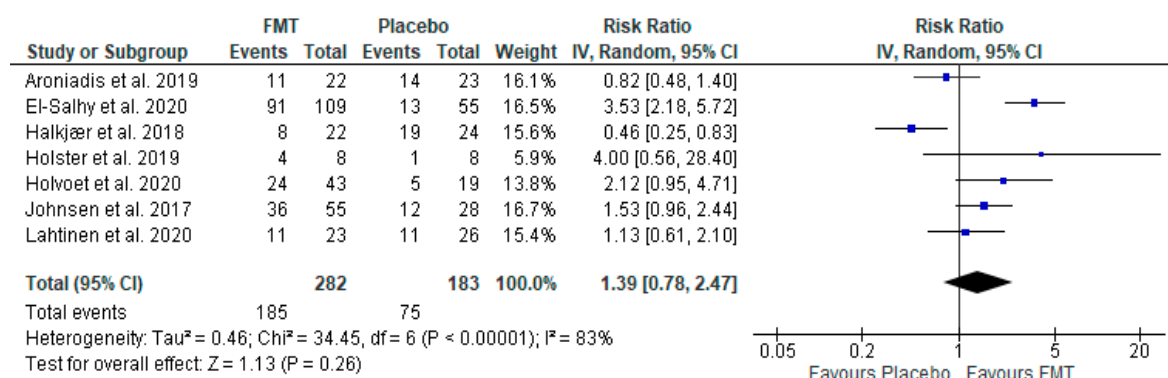

Abbreviations: CI: confidence interval; FMT: fecal microbiota transplantation; IBS: irritable bowel syndrome; RR: risk ratio.

**Supplementary Figure S3.** Forest plot of all studies for efficacy of FMT vs placebo on global improvement of IBS symptoms (without *intention-to-treat analysis*).
